# Supplementary material
Source: MDPI journal article supplement (https://www.mdpi.com/2071-1050/10/7/2508)
Supplement: s1 [file s1]

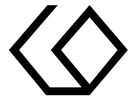

**Pädagogische Hochschule Freiburg**

Université des Sciences de l'Education · University of Education

# Kodierplan „BNE-Relevanz in den Lehrerfortbildungen“

**Projekt: BNE\_Indikator\_Lehrerfortbildung (BIL)**

Institut für Biologie und ihre Didaktik an der Pädagogischen Hochschule Freiburg

Kunzenweg 21

79117 Freiburg

link: <https://www.ph-freiburg.de/biologie/hp/riess/forschung/aktuelle-forschungsprojekte.html>

| Kategorien-<br>name /<br>Variable                              | Ausprägung                                            | Definition                                                                                                                                                                                                                     | Ankerbeispiele                                                                                                                                                                                                                                                                                                                                                                                                                                                                                                                                                                                                                                                                                                                                                                                                                                                                                                                                                                                                                                                                                                                                  | Kodierregeln                                                                                                                                                                                                                                                                                                                                                                                                                                                                                                                                                                                                                                                                                                                                                                                                                                                                                                                                                                                                  |
|----------------------------------------------------------------|-------------------------------------------------------|--------------------------------------------------------------------------------------------------------------------------------------------------------------------------------------------------------------------------------|-------------------------------------------------------------------------------------------------------------------------------------------------------------------------------------------------------------------------------------------------------------------------------------------------------------------------------------------------------------------------------------------------------------------------------------------------------------------------------------------------------------------------------------------------------------------------------------------------------------------------------------------------------------------------------------------------------------------------------------------------------------------------------------------------------------------------------------------------------------------------------------------------------------------------------------------------------------------------------------------------------------------------------------------------------------------------------------------------------------------------------------------------|---------------------------------------------------------------------------------------------------------------------------------------------------------------------------------------------------------------------------------------------------------------------------------------------------------------------------------------------------------------------------------------------------------------------------------------------------------------------------------------------------------------------------------------------------------------------------------------------------------------------------------------------------------------------------------------------------------------------------------------------------------------------------------------------------------------------------------------------------------------------------------------------------------------------------------------------------------------------------------------------------------------|
| Kategorie 1:<br>BNE -<br>Relevanz<br>der Themen<br>und Inhalte | Kat.: hohe BNE-<br>Relevanz der Themen<br>und Inhalte | Die in der<br>Fortbildungsausschreibung<br>genannten Inhalte sind Themen des<br>Nachhaltigkeitsdiskurses oder<br>werden unter<br>Nachhaltigkeitsgesichtspunkten<br>betrachtet und bilden den<br>Schwerpunkt der Veranstaltung. | <u>à R1: Bezug auf:</u><br>- Nachhaltige Entwicklung/Agenda 21<br>- Nachhaltigkeitsbewusstsein<br>- Nachhaltige Entwicklung der eigenen Schule<br>- zentrale Nachhaltigkeitsstrategien (z.B. Effizienzstrategie, Suffizienzstrategie, Permanenzstrategie, Konsistenzstrategie)<br>...<br><u>à R2: Bezug auf:</u><br>- Bildung für nachhaltige Entwicklung<br>- Globales Lernen<br>...<br><u>à R3: Beispiele für mehrdimensionale Themen:</u><br>- Ursachen und Folgen des Verlustes der biologischen Vielfalt<br>- Fairer Handel<br>- Nachhaltige Mobilität<br>- Süßwasserverknappung und ihre ökonomischen/gesellschaftlichen Folgen<br>- Ursachen und Folgen des Klimawandel<br>- Umgang mit Ressourcen und Sicherung der Grundbedürfnisse<br>- ökonomische Globalisierung und globale Entwicklungsdisparitäten/Armut<br>- kulturelle Diversität und soziale Ungleichheit<br>- Beiträge eines Managements natürlicher Ressourcen für den Umweltschutz<br>- ökologisch verträgliche Produktions- bzw. Konsummuster<br>...<br><u>à R4:</u><br>- Implementierung/Stärkung der Menschenrechte<br>- Armutslinderung<br>- nachhaltiges Wirtschaften | <b>R1:</b> Die Leitidee (das Leitbild) NE wird explizit in der Analyseeinheit (der gesamte Ausschreibungstext für eine Lehrerfortbildung mit Titel, Beschreibung, sonstigen Angaben) genannt bzw. bildet den inhaltlichen Schwerpunkt der Analyseeinheit.<br>oder<br><b>R2:</b> Das Thema wird ausdrücklich der BNE zugeordnet, soll also unter Nachhaltigkeitsgesichtspunkten betrachtet werden.<br>oder<br><b>R3:</b> Die mehrdimensionale (ökologische, ökonomische, sozio-kulturelle, intergenerationelle Dimension) Bedeutung des Themas der Fortbildung geht eindeutig aus der Analyseeinheit hervor / dimensionenübergreifende Zusammenhänge werden deutlich gemacht, d.h. soziale- kulturelle und ökologische Aspekte ODER ökonomische und sozio-kulturelle (usw.) Aspekte werden gemeinsam angesprochen.<br>oder<br><b>R4:</b> Ein Thema der ökologischen, sozialen oder ökonomischen Dimension UND damit verbunden eine zusätzlich normative Gewichtung:<br>1) Schutz der Umwelt (nicht nur Umwelt) |
|                                                                |                                                       |                                                                                                                                                                                                                                |                                                                                                                                                                                                                                                                                                                                                                                                                                                                                                                                                                                                                                                                                                                                                                                                                                                                                                                                                                                                                                                                                                                                                 |                                                                                                                                                                                                                                                                                                                                                                                                                                                                                                                                                                                                                                                                                                                                                                                                                                                                                                                                                                                                               |

|                                                             |                                                                                                                                                                           |                                                                                                                                                                                                                                                                                                                                                                                                                                                                                                                                                                                                                                                                                                                                                                                                                                                                             |                                                          |                                                                                                                                                                                                                                                                                                                                                                                                                                                                                                                                                                                                                                                   |
|-------------------------------------------------------------|---------------------------------------------------------------------------------------------------------------------------------------------------------------------------|-----------------------------------------------------------------------------------------------------------------------------------------------------------------------------------------------------------------------------------------------------------------------------------------------------------------------------------------------------------------------------------------------------------------------------------------------------------------------------------------------------------------------------------------------------------------------------------------------------------------------------------------------------------------------------------------------------------------------------------------------------------------------------------------------------------------------------------------------------------------------------|----------------------------------------------------------|---------------------------------------------------------------------------------------------------------------------------------------------------------------------------------------------------------------------------------------------------------------------------------------------------------------------------------------------------------------------------------------------------------------------------------------------------------------------------------------------------------------------------------------------------------------------------------------------------------------------------------------------------|
|                                                             |                                                                                                                                                                           |                                                                                                                                                                                                                                                                                                                                                                                                                                                                                                                                                                                                                                                                                                                                                                                                                                                                             | - Förderung der intergenerationalen Gerechtigkeit<br>... | 2) Gerechtere Gesellschaft (nicht nur Gesellschaft)<br>3) Bestandsfähige Wirtschaft (nicht nur Wirtschaft)                                                                                                                                                                                                                                                                                                                                                                                                                                                                                                                                        |
| <b>Kat. : partielle BNE-Relevanz der Themen und Inhalte</b> | Die Fortbildung befasst sich mit (möglichen) bedeutsamen Themen (Inhalten) der BNE/NE, <b>OHNE</b> explizite Nennung von NE als Leitidee oder einer Verortung in der BNE. | <ul style="list-style-type: none"> <li>- einzelne Ökosysteme (z.B. Wald)</li> <li>- Resilienz (in Bezug auf Ökosysteme)</li> <li>- biologische Vielfalt</li> <li>- Ökosystemansatz</li> <li>- Weltwirtschaft und Globalisierung ohne expliziter Bezug zu einer anderen Dimension (sozio-kulturell: bspw. Armut, Krieg-Frieden / ökologisch: bspw. Biodiversitätskrise)</li> <li>- Konsum- und Lebensstil</li> <li>- Menschenrechte;</li> <li>- Aufbau und Struktur des Menschenrechtsrats</li> <li>- interkulturelles Zusammenleben</li> <li>- Interkulturalität mit globalem Fokus (zwischen den Staatengemeinschaften)</li> <li>- Konflikte global und lokal</li> <li>- Flucht und Migration</li> <li>- Massentourismus</li> <li>- Müllvermeidung, Recycling</li> <li>- Gerechtigkeit</li> <li>- Friede</li> <li>- peace studies</li> <li>- Armut</li> <li>...</li> </ul> |                                                          | <b>R5:</b> Das Thema hat einen eindeutigen Bezug zur Leitidee „nachhaltige Entwicklung“ (spricht bspw. ein im Nachhaltigkeitsdiskurs bearbeitetes Problemfeld (bspw. Klimawandel) an), die Leitidee NE wird aber <b>nicht</b> explizit genannt <b>(R1) und</b> das Thema wird <b>nicht</b> ausdrücklich der BNE zugeordnet und unter Nachhaltigkeitsgesichtspunkten betrachtet werden <b>(R2) und</b> die mehrdimensionale Bedeutung (ökologische, ökonomische , sozio-kulturelle, intergenerationelle Dimension) wird <b>nicht</b> angesprochen <b>(R3) und</b> eine normative Gewichtung des Themas wird <b>nicht</b> vorgenommen <b>(R4)</b> . |

|                                                              |                                                                                                                        |                                                                                                                                                                                                                                                                                                                                                                                                                                                                                                                                                                                   |                                                                                                                                                                                                                                   |
|--------------------------------------------------------------|------------------------------------------------------------------------------------------------------------------------|-----------------------------------------------------------------------------------------------------------------------------------------------------------------------------------------------------------------------------------------------------------------------------------------------------------------------------------------------------------------------------------------------------------------------------------------------------------------------------------------------------------------------------------------------------------------------------------|-----------------------------------------------------------------------------------------------------------------------------------------------------------------------------------------------------------------------------------|
| <b>Kat.: potentielle BNE-Relevanz der Themen und Inhalte</b> | Die Fortbildung befasst sich mit Themen die denkbare Anknüpfungspunkte für Themen (Inhalte) der BNE/NE bilden könnten. | <ul style="list-style-type: none"> <li>-Strahlenschutzbeauftragter</li> <li>-Aufbau einer Wärme-Pumpe</li> <li>-Abfallwirtschaft</li> <li>-Bau eines Sonnenkollektors</li> <li>-Strukturwandel in der Gesellschaft</li> <li>-das politische System der Bundesrepublik Deutschland</li> <li>-das Wirtschaftssystem der Bundesrepublik Deutschland</li> <li>-Pflanzen- und Tierbestimmung</li> <li>- sich rein auf das Zusammenleben in Deutschland beziehenden interkulturellen Fragen (ohne übergreifenden gesellschaftlichen oder globalen Zusammenhang)</li> <li>...</li> </ul> | <b>R 6:</b> Wird kodiert wenn das Thema oder die Inhalte nicht eindeutig, aber <b>möglicherweise</b> BNE-relevant sein könnten und <b>R1-5 nicht</b> greift.                                                                      |
| <b>Kat.: Keine BNE-Relevanz der Themen und Inhalte</b>       | Der Schwerpunkt der Fortbildung berührt kein Thema oder Inhalt der BNE.                                                | <ul style="list-style-type: none"> <li>-Schulrecht</li> <li>-neue Bildungsstandards</li> <li>-Leistungsevaluation</li> <li>-Schwächen bei SchülerInnen (LRS, ADHS),</li> <li>-Elternberatung</li> <li>-Wintersporttage</li> <li>-Buchneuerscheinungen,</li> <li>- Neue Medien</li> <li>- Mentorenprogramm</li> <li>-Kommunikationsseminare</li> <li>-individuelle Faktoren der Lehrergesundheit (Entspannung, Stressmanagement)</li> <li>-Umgang mit dem Whiteboard</li> <li>-neue Medien im Klassenzimmer</li> <li>...</li> </ul>                                                | <b>R 7:</b> Wird kodiert, wenn das Thema oder die Inhalte <b>eindeutig nicht BNE-relevant</b> sind.                                                                                                                               |
| <b>missing</b>                                               | Kein Eintrag oder nicht eindeutig kodierbar.                                                                           |                                                                                                                                                                                                                                                                                                                                                                                                                                                                                                                                                                                   | <b>R 8:</b> Wird kodiert, wenn das Thema oder die Inhalte <b>nicht eindeutig</b> den Kategorien „hohe BNE-Relevanz der Themen und Inhalte“, „partielle BNE-Relevanz der Themen und Inhalte“, „potentielle BNE-Relevanz der Themen |

|                                            |                                    |                                                                                                                                                                                                                                                                                                                                                                                                                              |                                                                                                                                                                                                                                                                                                                                                                                                                                                                                                                                                                                                                                                                                                                                                                                                                                                                                                                                                                                                                                                                                                                                                                                                                                                                                                                                                                                                                                                                                         |                                                                                                                                              |
|--------------------------------------------|------------------------------------|------------------------------------------------------------------------------------------------------------------------------------------------------------------------------------------------------------------------------------------------------------------------------------------------------------------------------------------------------------------------------------------------------------------------------|-----------------------------------------------------------------------------------------------------------------------------------------------------------------------------------------------------------------------------------------------------------------------------------------------------------------------------------------------------------------------------------------------------------------------------------------------------------------------------------------------------------------------------------------------------------------------------------------------------------------------------------------------------------------------------------------------------------------------------------------------------------------------------------------------------------------------------------------------------------------------------------------------------------------------------------------------------------------------------------------------------------------------------------------------------------------------------------------------------------------------------------------------------------------------------------------------------------------------------------------------------------------------------------------------------------------------------------------------------------------------------------------------------------------------------------------------------------------------------------------|----------------------------------------------------------------------------------------------------------------------------------------------|
|                                            |                                    |                                                                                                                                                                                                                                                                                                                                                                                                                              |                                                                                                                                                                                                                                                                                                                                                                                                                                                                                                                                                                                                                                                                                                                                                                                                                                                                                                                                                                                                                                                                                                                                                                                                                                                                                                                                                                                                                                                                                         | und Inhalte“ oder „Keine BNE-Relevanz der Themen und Inhalte“ <b>zuordenbar sind.</b>                                                        |
| <b>Kategorie 2: BNE-Relevanz der Ziele</b> | <b>Kat. BNE-Relevanz der Ziele</b> | <p>Bedeutsame <b>Ziele</b> der BNE bilden den Schwerpunkt der Veranstaltung.</p> <p>Def.: In der Lehrerfortbildung werden für die teilnehmenden Lehrpersonen oder mit dem Blick auf den Unterricht für die SchülerInnen BNE-spezifische [nicht unspezifische wie "Lesen und Schreiben können"] Personenmerkmale angestrebt oder empfohlen, die für eine Gestaltung, Förderung und Realisierung einer NE benötigt werden.</p> | <p>Ankerbeispiele:</p> <p><u>Mögliche Ziele auf Seiten der Lehrpersonen:</u></p> <ul style="list-style-type: none"> <li>- BNE-spezifische pädagogische Expertise (pedagogical knowledge and abilities)</li> <li>- BNE-spezifische fachdidaktische Expertise (pedagogical content knowledge and abilities)</li> <li>- BNE-spezifische fachliche Expertise (content knowledge and abilities)</li> </ul> <p><u>Mögliche Ziele auf Seiten der SchülerInnen und LehrerInnen:</u></p> <ul style="list-style-type: none"> <li>-Gestaltungskompetenz, Globales Lernen</li> </ul> <p><b><u>Basale Nachhaltigkeitskompetenz:</u></b></p> <p><b><u>Überwiegend kognitive Zieldimension:</u></b> deklaratives, prozedurales, strategisches und situationales nachhaltigkeitsrelevantes "Allgemein"-Wissen.</p> <p>Bspw.: Kenntnis der Leitidee Nachhaltige Entwicklung, der Nachhaltigkeitsstrategien (Effizienz-, Permanenz-, Konsistenz- und Suffizienzstrategie, Resilienzsteigerung), des ökologischen Fußabdrucks, der Sustainable Development Goals(SDGs), nachhaltigkeitsbedeutsamer Problemlagen (Syndrome globalen Wandels), von Methoden zur Bearbeitung komplexer dynamischer nachhaltigkeitsrelevanter Probleme (bspw. Szenariotechnik, Grundlagen der Systemmodellentwicklung), von Nachhaltigkeitsförderlichen, -bedeutsamen, -relevanten Verhaltensweisen, von Barrieren und Hindernisse für nachhaltigkeitsförderliches Verhalten (u.a. Allemendeklemme), von unmittelbaren und</p> | <b>R 9:</b> Wird nur kodiert wenn BNE-relevante Ziele (für SchülerInnen und/oder Lehrer/-innen) als Ziele in der Fortbildung angegeben sind. |

|  |  |  |                                                                                                                                                                                                                                                                                                                                                                                                                                                                                                                                                                                                                                                                                                                                                                                                                                                                                                                                                                                                                                                                                                                                                                                                                                                                                                                                                                                                                                                                                                                         |  |
|--|--|--|-------------------------------------------------------------------------------------------------------------------------------------------------------------------------------------------------------------------------------------------------------------------------------------------------------------------------------------------------------------------------------------------------------------------------------------------------------------------------------------------------------------------------------------------------------------------------------------------------------------------------------------------------------------------------------------------------------------------------------------------------------------------------------------------------------------------------------------------------------------------------------------------------------------------------------------------------------------------------------------------------------------------------------------------------------------------------------------------------------------------------------------------------------------------------------------------------------------------------------------------------------------------------------------------------------------------------------------------------------------------------------------------------------------------------------------------------------------------------------------------------------------------------|--|
|  |  |  | <p><i>langfristigen Folgen nachhaltigkeitsrelevanten Verhaltens (Handlungs-Ergebnis-Erwartungen sowie Instrumentalitäts-Erwartungen), von Methoden ethischen Argumentierens in Nachhaltigkeitskontexten, der im Nachhaltigkeitsdiskurs verwendeten Moralprinzipien (bspw. kategorischer Imperativ (Kant), die Forderung des idealen Beobachters im Schleier der Unwissenheit (Rawls)), das allgemeine Wohlergehen (Utilitarismus)) und empfohlenen Basiswerte (bspw. Humanität, Menschenwürde, Freiheit, Gleichheit, Gerechtigkeit, Ehrfurcht vor dem Lebendigen, Natur als Selbstwert,</i></p> <p>...</p> <p><b><u>Vorwiegend affektive und soziale Zieldimension:</u></b><br/> <i>Nachhaltigkeitsrelevante, -bedeutsame, -förderliche Einstellungen, Werthaltungen, Verhaltensbereitschaften, motivationale und volitionale Merkmale. Bspw. Reflexion und am Ende selbstbestimmte Akzeptanz der intra-und intergenerationale Gerechtigkeitsvorstellungen, aus Einsicht erwachsene Zustimmung zu nachhaltigkeitsförderlichen Lebensstilen, Basiswerten und -normen, nachhaltigkeitsförderliche Verhaltensbereitschaften, angemessene interne Verantwortungsattribution (Bereitschaft zur Mitverantwortung), nachhaltigkeitsförderliche subjektive Normen, Selbstwirksamkeitserwartungen,</i></p> <p>...</p> <p><b><u>Verhaltensbezogene (psychomotorische, d.h. physische, manuelle, motorische, sensorische oder technische) Zieldimension:</u></b><br/> <i>Entwicklung nachhaltigkeitsförderlicher Routinen,</i></p> |  |
|--|--|--|-------------------------------------------------------------------------------------------------------------------------------------------------------------------------------------------------------------------------------------------------------------------------------------------------------------------------------------------------------------------------------------------------------------------------------------------------------------------------------------------------------------------------------------------------------------------------------------------------------------------------------------------------------------------------------------------------------------------------------------------------------------------------------------------------------------------------------------------------------------------------------------------------------------------------------------------------------------------------------------------------------------------------------------------------------------------------------------------------------------------------------------------------------------------------------------------------------------------------------------------------------------------------------------------------------------------------------------------------------------------------------------------------------------------------------------------------------------------------------------------------------------------------|--|

|  |  |  |                                                                                                                                                                                                                                                                                                                                                                                                                                                                                                                                                                                                                                                                                                                                                                                                                                                                                                                                                                                                                                                                                                                                                                                                                                                                                                                                                                                                             |  |
|--|--|--|-------------------------------------------------------------------------------------------------------------------------------------------------------------------------------------------------------------------------------------------------------------------------------------------------------------------------------------------------------------------------------------------------------------------------------------------------------------------------------------------------------------------------------------------------------------------------------------------------------------------------------------------------------------------------------------------------------------------------------------------------------------------------------------------------------------------------------------------------------------------------------------------------------------------------------------------------------------------------------------------------------------------------------------------------------------------------------------------------------------------------------------------------------------------------------------------------------------------------------------------------------------------------------------------------------------------------------------------------------------------------------------------------------------|--|
|  |  |  | <p><i>Gewohnheiten und Lebensstile, Umweltverhalten, -handeln, ressourcenschonende Verhaltensweisen, Naturschutzverhalten,</i></p> <p>...</p> <p><b><u>Kognition (kognitive Fähigkeiten und Fertigkeiten zum Lösen nachhaltigkeitsrelevanter Probleme), Motivation? und Volition? umfassende übergeordnete Zieldimensionen:</u></b></p> <p><i>nachhaltigkeitsförderliche Kompetenzen. Bspw. Vernetztes Denken, allgemeines Systemisches Denken (Systemkompetenz), Bewertungskompetenz, Partizipationskompetenz,</i></p> <p>...</p> <p><b><u>Bereichsspezifische Nachhaltigkeitskompetenz</u></b></p> <p><b><u>Bereichsspezifisches nachhaltigkeitsrelevantes Wissen, Fähigkeiten, Fertigkeiten und Kompetenzen:</u></b></p> <p><i>Kompetenzen und Fähigkeiten: bereichsspezif. Systemisches Denken – Systemkompetenz; Fähigkeiten zur Untersuchung von Gewässergüte, Schadstoffbelastungen usw.; Experimentelle Kompetenz in ökologischen Kontexten; Fähigkeit zur Bestimmung des Wirkungsgrades von technischen Geräten; Wissen über: Ursachen und Folgen des Klimawandels, Biodiversitätskrise; Urbanisierung und nachhaltige Stadtentwicklung; Flucht und Asyl; Syndromkonzept; Lebensmittelverschwendung; Globaler Wandel; Wirtschaftswachstumsmodelle; Umweltschutz; erneuerbare Energien; Wachstumsmodelle für Populationen; Ökosystemansatz; Naturschutz; Management natürlicher Ressourcen;</i></p> |  |
|--|--|--|-------------------------------------------------------------------------------------------------------------------------------------------------------------------------------------------------------------------------------------------------------------------------------------------------------------------------------------------------------------------------------------------------------------------------------------------------------------------------------------------------------------------------------------------------------------------------------------------------------------------------------------------------------------------------------------------------------------------------------------------------------------------------------------------------------------------------------------------------------------------------------------------------------------------------------------------------------------------------------------------------------------------------------------------------------------------------------------------------------------------------------------------------------------------------------------------------------------------------------------------------------------------------------------------------------------------------------------------------------------------------------------------------------------|--|

|                                           |                                                              |                                                                                                                                                                                                     |                                                                                                                                                                                                                                                                                                                                                                                                                   |                                                                                                                                                                                                                                                            |
|-------------------------------------------|--------------------------------------------------------------|-----------------------------------------------------------------------------------------------------------------------------------------------------------------------------------------------------|-------------------------------------------------------------------------------------------------------------------------------------------------------------------------------------------------------------------------------------------------------------------------------------------------------------------------------------------------------------------------------------------------------------------|------------------------------------------------------------------------------------------------------------------------------------------------------------------------------------------------------------------------------------------------------------|
|                                           |                                                              |                                                                                                                                                                                                     | <i>Produktion- und Konsummuster; Ursachen für Armut;<br/>...</i>                                                                                                                                                                                                                                                                                                                                                  |                                                                                                                                                                                                                                                            |
|                                           | <b>Kat.: Keine BNE-Relevanz der Ziele</b>                    | Def.: Die genannten Ziele stimmen in keiner Weise mit den Zielen der BNE überein.                                                                                                                   | - <i>Vermittlung von Unterrichtskonzepten für einen langfristigen Lernerfolg (Nachhaltigkeit nicht im Sinne der BNE, sondern um langfristigen Lernerfolg und Gedächtnisleistung zu erhöhen)</i><br>- <i>Schubert das Kunstlied, Rechnen im Zahlenraum von 1-100, der Linoldruck, Herz-Kreislaufsystem, Französische Grammatik, Vokabeltraining, Die mittelalterliche Burg, Rhythmische Sportgymnastik,</i><br>... | <b>R10:</b> Wird kodiert, wenn die formulierten Ziele eindeutig <b>nicht</b> BNE-relevant sind.                                                                                                                                                            |
|                                           | <b>missing</b>                                               | Kein Eintrag oder nicht eindeutig kodierbar                                                                                                                                                         |                                                                                                                                                                                                                                                                                                                                                                                                                   | <b>R 11:</b> Wird kodiert, wenn die Ziele <b>nicht eindeutig</b> den Kategorien „BNE-Relevanz der Ziele“ oder „Keine BNE-Relevanz der Ziele“ <b>zuordenbar sind</b> .<br><br><b>R12:</b> Wird kodiert, wenn in der Fortbildung keine Ziele genannt werden. |
|                                           |                                                              |                                                                                                                                                                                                     |                                                                                                                                                                                                                                                                                                                                                                                                                   |                                                                                                                                                                                                                                                            |
| <b>Kategorie 3: Mittel-/Methodenebene</b> | <b>Kat. Ebenenübergreifende Mittel = 4</b>                   | Def.: Die Organisationsebenen des allgemeinen Bildungssystems, für welche Maßnahmen, Mittel, Verfahren und Technologien zur Förderung von BNE-Zielen in der Fortbildung empfohlen/angeboten werden. | <i>s. Kategorien 3.1, 3.2. und 3.3. in Kombination</i>                                                                                                                                                                                                                                                                                                                                                            | <b>R13:</b> Wird kodiert, wenn sich die in der Analyseeinheit genannten Mittel/Methoden/Verfahren/Technologien mindestens zwei Ebenen zuordnen lassen.                                                                                                     |
|                                           | <b>Kat.: Mittel auf der Bundeslandebene (Makroebene) = 3</b> | Def.: Mittelempfehlungen, die auf der Bundeslandebene BNE-Ziele wirksam fördern sollen, also potentiell alle (viele) Schulen, Lehrer/-innen und SchülerInnen betreffen.                             | - <i>Veranstaltung von Wettbewerben</i><br>- <i>Bildungspläne</i><br>- <i>Einrichtung von Homepages für die BNE (Lehrerplattformen, Informationen zu Kooperationen,</i><br>- <i>Methoden/Mittel einer BNE</i><br>- <i>Bereitstellung von Medien, Materialien für die BNE</i><br>- <i>Formulierung von Aktionsplänen</i>                                                                                           | <b>R14:</b> Wird kodiert, wenn sich die in der Analyseeinheit genannten Mittel <b>ausschließlich</b> auf die Bundeslandebene (Makroebene) beziehen.                                                                                                        |



|  |                                                             |                                                                                                                                                                          |                                                                                                                                                                                                                                                                                                                                                                                                                                                                                                                                                                         |                                                                                                                                                                                                                                                                                                                                                                             |
|--|-------------------------------------------------------------|--------------------------------------------------------------------------------------------------------------------------------------------------------------------------|-------------------------------------------------------------------------------------------------------------------------------------------------------------------------------------------------------------------------------------------------------------------------------------------------------------------------------------------------------------------------------------------------------------------------------------------------------------------------------------------------------------------------------------------------------------------------|-----------------------------------------------------------------------------------------------------------------------------------------------------------------------------------------------------------------------------------------------------------------------------------------------------------------------------------------------------------------------------|
|  |                                                             |                                                                                                                                                                          | - Förderung von Partnerschaften und Netzwerken<br>...                                                                                                                                                                                                                                                                                                                                                                                                                                                                                                                   |                                                                                                                                                                                                                                                                                                                                                                             |
|  | <b>Kat.: Mittel auf Schulebene (Mesoebene)=2</b>            | Def.: Mittelempfehlungen, die auf der Ebene einer ganzen Schule BNE-Ziele wirksam fördern sollen, also potentiell alle (viele) Lehrer/-innen und SchülerInnen betreffen. | - Einrichtung einer (Umwelt-) Nachhaltigkeitsexpertengruppe, Nachhaltigkeitsrates, ... (Lehrer/-innen, Schulleitung, Hausmeister, SchülerInnen)<br>- Schulung und Beauftragung von Energiesparfüchsen, .... (Schüler/-innen)<br>- Aufbau einer Partnerschaft mit einer Schule im Ausland<br>- Verkauf von Fair-Trade, regionalen, ... Produkten<br>- Kooperationen mit außerschulischen (Bildungs- ) Institutionen, die sich in Nachhaltigkeitskontexten bewegen bzw. Ziele einer Nachhaltigen Entwicklung anstreben ...<br>- Einrichtung von SchülerInnenfirmen<br>... | <b>R15:</b> Wird kodiert, wenn sich die in der Analyseeinheit genannten Mittel zur <b>ausschließlich</b> auf die Schulebene (Mesoebene) beziehen.                                                                                                                                                                                                                           |
|  | <b>Kat.: Mittel auf der Unterrichtsebene (Mikroebene)=1</b> | Def.: Mittelempfehlungen, die auf der Ebene einer Klasse BNE-Ziele wirksam fördern sollen, also potentiell alle (viele) SchülerInnen einer Klasse betreffen.             | - Durchführung von Planspielen,<br>- Einsatz der Szenario-Technik,<br>- Treffen mit Mitarbeitern der Lokalen Agenda vor Ort, Kontakt mit Solidaritätsgruppen,<br>- Einladung eines Entwicklungshelfers in den Unterricht,<br>- Durchführung einer Zukunftswerkstatt<br>...                                                                                                                                                                                                                                                                                              | <b>R16:</b> Wird kodiert, wenn sich die in der Analyseeinheit genannten Mittel <b>ausschließlich</b> auf der Unterrichtsebene (Mikroebene) beziehen.                                                                                                                                                                                                                        |
|  | <b>Missing = 9</b>                                          | Def.: Kein Eintrag oder nicht eindeutig kodierbar                                                                                                                        |                                                                                                                                                                                                                                                                                                                                                                                                                                                                                                                                                                         | <b>R 17:</b> Wird kodiert, wenn die Mittel <b>nicht eindeutig</b> den Kategorien „Ebenenübergreifende Mittel“ oder „Mittel auf der Bundeslandebene (Makroebene)“ oder „Mittel auf Schulebene (Mesoebene)“ oder „Mittel auf der Unterrichtsebene (Mikroebene)“ <b>zuordenbar</b> sind.<br><br><b>R18:</b> Wird kodiert, wenn in der Fortbildung keine Mittel genannt werden. |
|  |                                                             |                                                                                                                                                                          |                                                                                                                                                                                                                                                                                                                                                                                                                                                                                                                                                                         |                                                                                                                                                                                                                                                                                                                                                                             |

|                                            |                                 |                                                                                                |                                                                                                                                                                                                                                                                                                                                                                                                                                                                                                                                                                                                                                                                                                                                                                                                                                                                                                                                                                                                                                                                                                  |                                                                                                                                                                                                                       |
|--------------------------------------------|---------------------------------|------------------------------------------------------------------------------------------------|--------------------------------------------------------------------------------------------------------------------------------------------------------------------------------------------------------------------------------------------------------------------------------------------------------------------------------------------------------------------------------------------------------------------------------------------------------------------------------------------------------------------------------------------------------------------------------------------------------------------------------------------------------------------------------------------------------------------------------------------------------------------------------------------------------------------------------------------------------------------------------------------------------------------------------------------------------------------------------------------------------------------------------------------------------------------------------------------------|-----------------------------------------------------------------------------------------------------------------------------------------------------------------------------------------------------------------------|
| Kategorie 4:<br>Lehr-/Lern-<br>materialien | Kat.: Lehr-/<br>Lernmaterialien | Def.: In der Fortbildung verwendete,<br>vorgestellte bzw. empfohlene Lehr-<br>/Lernmaterialien | <ul style="list-style-type: none"> <li>- Unterrichtsbeispiele aus didaktischen Zeitschriften</li> <li>- Materialien von Umweltorganisationen</li> <li>- Materialien von Organisationen aus der<br/>Entwicklungspolitik oder Entwicklungshilfe</li> <li>- Selbsterarbeitete Unterlagen (Arbeitsblätter)</li> <li>- Materialien von öffentlichen Einrichtungen (Ministerien,<br/>Behörden, ...)</li> <li>- Lehrbücher</li> <li>- Schulbücher</li> <li>- Werkstätten</li> <li>- Arbeitshefte</li> <li>- Materialien von internetbasierten Datenbanken für Lehrer/-<br/>innen (bspw. Lehrer-online, ...)</li> <li>- Texte</li> <li>- Untersuchungs-und Analyseausrüstung</li> <li>- Filme und Videos</li> <li>- Bilder</li> <li>- Tonmedien (Audiodateien, Hörbücher, ...)</li> <li>- Populärwissenschaftliche Bücher, Lexika</li> <li>- Zeitungen, Illustrierte, Magazine</li> <li>- Materialien aus den Modellprogrammen BLK „21“,<br/>„Transfer 21“</li> <li>- Modelle (z.B. Kläranlage, Landschaftsmodell)</li> <li>- Internet,</li> <li>- digitale (interaktive) Medien</li> <li>...</li> </ul> | <b>R19:</b> Wird kodiert, wenn<br>Unterrichtsmaterialien, Medien, Objekte,<br>Quellen für den Einsatz im BNE-<br>bezogenen Unterricht in der<br>Analyseeinheit angeführt/empfohlen<br>werden.                         |
|                                            | missing                         | Kein Eintrag oder nicht eindeutig<br>kodierbar                                                 |                                                                                                                                                                                                                                                                                                                                                                                                                                                                                                                                                                                                                                                                                                                                                                                                                                                                                                                                                                                                                                                                                                  | <b>R20:</b> Wird kodiert, wenn die<br>genannten/empfohlenen Materialien <b>nicht<br/>eindeutig</b> der Kategorie Lehr-<br>/Lernmaterial <b>zuordenbar</b> sind, oder<br>wenn kein Lehr-/Lernmaterial genannt<br>wird. |
|                                            |                                 |                                                                                                |                                                                                                                                                                                                                                                                                                                                                                                                                                                                                                                                                                                                                                                                                                                                                                                                                                                                                                                                                                                                                                                                                                  |                                                                                                                                                                                                                       |

|                                                                                     |                                                                   |                                                                                                                                                |  |  |
|-------------------------------------------------------------------------------------|-------------------------------------------------------------------|------------------------------------------------------------------------------------------------------------------------------------------------|--|--|
| <b>Kategorie 5:<br/>Zeitlicher<br/>Umfang der<br/>Fortbildung</b>                   | <b>Kat.: Halb-/<br/>Ganztageskurs</b>                             | Def.: Die Fortbildung hat einen zeitlichem Umfang von max. einem Tag.                                                                          |  |  |
|                                                                                     | <b>Kat.: Mehrtägige<br/>Veranstaltung</b>                         | Def.: Die Fortbildung dauert mehr als einen Tag (> 8 Stunden), unabhängig davon ob sie geblockt oder verteilt auf mehrere Tage angeboten wird. |  |  |
|                                                                                     | <b>missing</b>                                                    | Kein Eintrag oder nicht eindeutig kodierbar                                                                                                    |  |  |
|                                                                                     |                                                                   |                                                                                                                                                |  |  |
| <b>Kategorie 6:<br/>Fachspezif.<br/>vs. Fächer-<br/>übergreifen<br/>des Angebot</b> | <b>Kat.: fachspezifisch</b>                                       | Def.: Die Lefo wird nur für ein Schulfach ausgeschrieben.                                                                                      |  |  |
|                                                                                     | <b>Kat. fächerübergreifend</b>                                    | Def.: Die Lefo wird zumindest für zwei Fächer ausgeschrieben.                                                                                  |  |  |
|                                                                                     | <b>missing</b>                                                    | Kein Eintrag oder nicht eindeutig kodierbar                                                                                                    |  |  |
|                                                                                     |                                                                   |                                                                                                                                                |  |  |
|                                                                                     |                                                                   |                                                                                                                                                |  |  |
|                                                                                     | <b>Kat.: Gymnasium (Sek. I<br/>und Sek. II)</b>                   | Def.: Die Fortbildung ist nur für Lehrer/-innen an Gymnasien ausgeschrieben.                                                                   |  |  |
|                                                                                     | <b>Kat.: Gesamt-/<br/>Gemeinschaftsschule<br/>(Sek. I und II)</b> | Def.: Die Fortbildung ist nur für Lehrer/-innen an Gesamt- und Gemeinschaftsschulen ausgeschrieben.                                            |  |  |
|                                                                                     | <b>Kat.: Real-/Mittelschule<br/>(Sek. I)</b>                      | Def. Die Fortbildung ist nur für Lehrer/-innen an Real- bzw. Mittelschulen ausgeschrieben.                                                     |  |  |
|                                                                                     | <b>Kat.: Haupt-/<br/>Werkrealschule (Sek. I)</b>                  | Def.: Die Fortbildung ist nur für Lehrer/-innen an Haupt- bzw. Werkrealschulen ausgeschrieben.                                                 |  |  |

|                                          |                                                                                                       |                                                                                                                                                                 |                                                                                 |  |
|------------------------------------------|-------------------------------------------------------------------------------------------------------|-----------------------------------------------------------------------------------------------------------------------------------------------------------------|---------------------------------------------------------------------------------|--|
|                                          | <b>Kat.: Grundschule (Primarstufe)</b>                                                                | Def.: Die Fortbildung ist nur für Lehrer/-innen an Grundschulen ausgeschrieben.                                                                                 |                                                                                 |  |
|                                          | <b>missing</b>                                                                                        | Kein Eintrag oder nicht eindeutig kodierbar                                                                                                                     |                                                                                 |  |
|                                          |                                                                                                       |                                                                                                                                                                 |                                                                                 |  |
| <b>Kategorie 8: Veranstaltungsort</b>    | <b>Kat.: schulextern-zentral</b>                                                                      | Def.: Die Fortbildung wird ausschließlich an einer (oder mehreren) staatlichen Lehrerakademie(n) (spezieller Ort für die Lehrerbildung, 3. Phase) ausgerichtet. | - Lehrerfortbildungsinsitut<br>- Lehrerakademie<br>...                          |  |
|                                          | <b>Kat.: schulextern dezentral</b>                                                                    | Def.: Die Fortbildung wird an einer oder mehreren <b>nicht staatlichen Einrichtungen</b> ausgerichtet.                                                          | -Fair-Trade-Laden<br>-Ökologiestation<br>-Waldhaus<br>-Naturschutzgebiet<br>... |  |
|                                          | <b>Kat.: schulintern <u>und</u> - extern (in der Schule <u>und</u> an außerschulischen Lernorten)</b> | Def.: Die Fortbildung wird an einer Schule <b><u>und</u> an einer oder mehreren nicht-staatlichen</b> Einrichtungen ausgerichtet.                               |                                                                                 |  |
|                                          | <b>Kat.: schulintern</b>                                                                              | Def.: Die Fortbildung wird <b>ausschließlich</b> an einer Schule ausgerichtet.                                                                                  |                                                                                 |  |
|                                          | <b>missing</b>                                                                                        | Kein Eintrag oder nicht eindeutig kodierbar                                                                                                                     |                                                                                 |  |
|                                          |                                                                                                       |                                                                                                                                                                 |                                                                                 |  |
| <b>Kategorie 9: Fächergruppe/ Fächer</b> | <b>Nawi vs. Sowi vs. Sprachen vs. musisch-ästhet. vs. Sonst.</b>                                      |                                                                                                                                                                 |                                                                                 |  |
|                                          | <b>Auflistung der Schulfächer</b>                                                                     |                                                                                                                                                                 |                                                                                 |  |
