# Supplementary material
Source: MDPI journal article supplement (https://www.mdpi.com/2071-1050/10/7/2508)
Supplement: s1 [file s1]

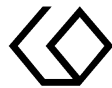

## Schlagwortliste BNE für Datenbankrecherchen:

| Schlagwort                                                                                   | Dadurch mit erfasst (Beispiele)                                                                                                                                                                                              |
|----------------------------------------------------------------------------------------------|------------------------------------------------------------------------------------------------------------------------------------------------------------------------------------------------------------------------------|
| <b>Schlagwörter: übergreifende Begriffe</b> (5)                                              |                                                                                                                                                                                                                              |
| "bne*"                                                                                       | BNE-Fortbildung, BNE-Thema, BNE-Bezug, ....                                                                                                                                                                                  |
| "nachhalt*"                                                                                  | Nachhaltigkeit, nachhaltig, nachhaltige Entwicklung, Bildung für nachhaltige Entwicklung, Bildung zur nachhaltigen Entwicklung, Nachhaltigkeitsbewusstsein, nachhaltigkeitsrelevante, ....                                   |
| "sustain*"                                                                                   | Sustainability, Sustainable Development, Education for Sustainable Development, ...                                                                                                                                          |
| "entwicklung*"                                                                               | Entwicklungsmöglichkeiten, Weiterentwicklung, nachhaltige Entwicklung, Bildung für nachhaltige Entwicklung, Bildung zur nachhaltigen Entwicklung, Globale Entwicklung, Entwicklungsmöglichkeiten, Entwicklungspotential, ... |
| "sdg*"                                                                                       | SDGs, SDG, ...                                                                                                                                                                                                               |
| <b>Schlagwörter: Dimensionen der NE mit starkem ökologischem und ökonomischem Bezug</b> (15) |                                                                                                                                                                                                                              |
| "welt*"                                                                                      | Umweltbildung, Umwelterziehung, Umweltbewusstsein, Umweltpädagogik, Umweltdidaktik, Umweltlernen, Weltwirtschaft, Welthungerhilfe,...                                                                                        |
| "global*"                                                                                    | Globalisierung, Globales Lernen, Globale Entwicklung, Globale Erderwärmung,...                                                                                                                                               |
| "natur*"                                                                                     | Naturerfahrung, Naturwissenschaft, Naturpädagogik, naturwissenschaftlich, ...                                                                                                                                                |
| "arten*"                                                                                     | Artenvielfalt, Artensterben,...                                                                                                                                                                                              |
| "biodiversität*"                                                                             | Biodiversitätsverlust, Biodiversitäts-Abkommen ...                                                                                                                                                                           |
| "öko*"                                                                                       | Ökosystem, Ökologie, Ökonomie,...                                                                                                                                                                                            |
| "klima*"                                                                                     | Klimawandel, Klimaveränderung, Klimagipfel,...                                                                                                                                                                               |
| "treibhauseffekt*"                                                                           |                                                                                                                                                                                                                              |
| "mobilität*"                                                                                 | Nachhaltige Mobilität, Mobilitätsdebatte,...                                                                                                                                                                                 |
| "wirtschaft*"                                                                                | Wirtschaftskrise, Wirtschaftssystem,...                                                                                                                                                                                      |
| "energie*"                                                                                   | Energiewende, Energiekrise, erneuerbare Energien, Regenerative Energien,...                                                                                                                                                  |
| "ressourcen*"                                                                                | Ressourcengerechtigkeit, Ressourcenverbrauch, Ressourcenknappheit,...                                                                                                                                                        |
| "stoffkreisl *"                                                                              | Stoffkreisläufe, Stoffkreislauf,...                                                                                                                                                                                          |
| "saisonal*"                                                                                  | Saisonaler Anbau, ...                                                                                                                                                                                                        |
| "ernährung *"                                                                                | Ernährungssysteme, Ernährungswende,...                                                                                                                                                                                       |
| <b>Schlagwörter: Dimensionen der BNE mit starkem sozio-kulturellem Bezug</b> (8)             |                                                                                                                                                                                                                              |

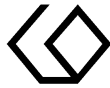

|                                                                                       |                                                                                         |
|---------------------------------------------------------------------------------------|-----------------------------------------------------------------------------------------|
| "konsum*"                                                                             | <i>Konsumkritik, globaler Konsum,...</i>                                                |
| "fair*"                                                                               | <i>Fairer Handel, Fair Trade, fairen Handeln, Fair-trade-Label,...</i>                  |
| "gerecht*"                                                                            | <i>Ressourcengerechtigkeit, intergenerationale Gerechtigkeit,...</i>                    |
| "frieden*"                                                                            | <i>Friedensstrategien, friedensschaffende Systeme, ....</i>                             |
| "system*"                                                                             | <i>Systemkritik, systemisches Denken, system thinking,...</i>                           |
| "sozial*"                                                                             | <i>Soziale Gerechtigkeit,...</i>                                                        |
| "interkulturell*"                                                                     | <i>Interkulturelles Lernen,...</i>                                                      |
| "intergeneration*"                                                                    | <i>Intergenerationale Gerechtigkeit, ...</i>                                            |
| <b>Schlagwörter: Zielkriterien der BNE und wichtige Nachhaltigkeitsstrategien (6)</b> |                                                                                         |
| "partizipat*"                                                                         | <i>Partizipationsmöglichkeiten, partizipativ,...</i>                                    |
| "gestaltungs*"                                                                        | <i>Gestaltungsmöglichkeiten, Gestaltungskompetenz, Gestaltungsfreiheit,...</i>          |
| "effizienz*"                                                                          | <i>Effizienzstrategien, effizienter, ...</i>                                            |
| "suffizienz*"                                                                         | <i>Suffizienzstrategien, suffizienter,...</i>                                           |
| "konsistenz*"                                                                         | <i>Konsistenzstrategie, ...</i>                                                         |
| "perma*"                                                                              | <i>Permanenzstrategie, Permakultur, Permaforst, ...</i>                                 |
| <b>Schlagwörter: Dimensionen der NE mit starkem intergenerationalem Bezug (3)</b>     |                                                                                         |
| "zukunft*"                                                                            | <i>Zukunftsperspektiven, Zukunftsszenarien, Zukunftsplanung, Zukunftsforschung, ...</i> |
| "transformation*"                                                                     | <i>Transformationsforschung, ...</i>                                                    |
| "wandel*"                                                                             | <i>Klimawandel, ...</i>                                                                 |



->37 Schlagwörter tunkiert mit Boole'schen Operatoren:

*"bne\*" OR "nachhalt\*" OR "entwicklung\*" OR "sustain\*" OR "sdg\*" OR "natur\*" OR  
"global\*" OR "welt\*" OR "ernährung\*" OR "saisonal\*" OR "stoffkreisl\*" OR "ressourcen\*" OR  
"energie\*" OR "wirtschaft\*" OR "mobilität\*" OR "treibhauseffekt\*" OR "klima\*" OR  
"welt\*" OR "öko\*" OR "biodiversität\*" OR "arten\*" OR "frieden\*" OR "transformation\*" OR  
"zukunft\*" OR "perma\*" OR "konsistenz\*" OR "suffizienz\*" OR "effizienz\*" OR  
"gestaltungs\*" OR "partizipat\*" OR "intergeneration\*" OR "interkulture\*" OR "sozial\*" OR  
"system\*" OR "gerecht\*" OR "fair\*" OR "konsum\*" "wandel\*"*

->37 Schlagwörter: trunkiert ohne Boole'sche Operatoren:

*bne\*  
nachhalt\*  
sustain\*  
entwicklung\*  
sdg\*  
welt\*  
global\*  
natur\*  
arten\*  
biodiversität\*  
öko\*  
klima\*  
treibhauseffekt\*  
mobilität\*  
wirtschaft\*  
energie\*  
ressourcen\*  
stoffkreis\*  
saisonal\*  
ernährung\*  
konsum\*  
fair\*  
gerecht\*  
frieden\*  
system\*  
sozial\*  
interkulturell\*  
intergeneration\*  
partizipat\*  
gestaltungs\*  
effizienz\*  
suffizienz\*  
konsistenz\*  
perma\**



---

*zukunft\**  
*transformation\**  
*wandel\**

->37 Schlagwörter: ohne Trunkierung ohne Boole'sche Operatoren:

*bne*  
*nachhalt*  
*sustain*  
*entwicklung*  
*sdg*  
*welt*  
*global*  
*natur*  
*arten*  
*biodiversität*  
*öko*  
*klima*  
*treibhauseffekt*  
*mobilität*  
*wirtschaft*  
*energie*  
*ressourcen*  
*stoffkreis*  
*saisonal*  
*ernährung*  
*konsum*  
*fair*  
*gerecht*  
*frieden*  
*system*  
*sozial*  
*interkulturell*  
*intergeneration*  
*partizipat*  
*gestaltungs*  
*effizienz*  
*suffizienz*  
*konsistenz*  
*perma*  
*zukunft*  
*transformation*  
*wandel*
